# Supplementary material for: High-quality chromosome-level genome assembly of Tibetan fox (Vulpes ferrilata)
Source: PubMed Central journal article supplement — Zool Res. 2022 May 18;43(3):362–6. doi: 10.24272/j.issn.2095-8137.2021.399 (PMC9113974; doi:10.24272/j.issn.2095-8137.2021.399), 2022-05-18
Supplement: zr-43-3-362-S1.pdf [file zr-43-3-362-S1.pdf]

## Supplementary Materials

### Materials and Methods

#### 1.1 Sample collection and sequencing

We collected a male *V. ferrilata* sample for genome sequencing, transcriptome sequencing and genome assembly from Gande County, Tibetan Autonomous Prefecture of Golog, Qinghai Province (33°541 " N, 99 ° 4854 " E). The white muscle from the legs and the blood were immediately placed into a dry ice kit to ensure the accuracy of sequencing. For RNA extraction, six organs (heart, liver, lung, gut, testis, and kidney) were cut into pieces and mixed with RNAlater. The samples were stored in an ultra-low temperature refrigerator at -80 °C for further use. All sample collection and experiments were approved by the Qinghai Forestry and Grassland Bureau and conformed to the guidelines established by the Ethics Committee for the Care and Use of Laboratory Animals of the Qufu Normal University (permit number: QFNU2018-013). See the supplementary appendix for relevant approval procedures.

The white muscle of *V. ferrilata* was ground into powder in liquid nitrogen, and sufficient high-quality DNA was extracted using the cetyltrimethylammonium bromide (CTAB) method (Stewart and Via, 1993). The obtained DNA was purified and enriched using the Blood & Cell Culture DNA Midi kit (Qiagen, Germany) and Oligo (dT) 0.5X magnetic beads. Then, DNA was detected and evaluated using 0.7% agarose gel pulse (Lonza) electrophoresis, Qubit (Thermo Fisher Scientific, USA), and Nanodrop (Thermo Fisher Scientific, USA). MGIEasy Universal DNA Library Prep Kit V1.0 (CAT#1000005250, MGI) was used to construct a paired - end sequencing library following the standard protocol. The library was sequenced on the MGISEQ2000 platform according to the manufacturer's instructions. We used the SageHL HMW library system (Sage Science, USA) to select about 8-10 µg of gDNAs (>50 kb) for each Nanopore library and processed them using the Ligation Sequencing 1D kit (SQK-LSK109, Oxford Nanopore Technologies, UK). Approximately 800 ng of DNA libraries were constructed and sequenced by Promethion (Oxford Nanopore Technologies, UK) at the Grandomics Genome Centre in Wuhan, China.

In the Hi-C experiment, chromatin was digested with 400 U of MboI restriction enzyme (NEB) after cross-linking. Then, the DNA ends were labeled with biotin, incubated for 45 min at 37 °C, and the enzyme was inactivated in 20% SDS solution. T4 DNA ligase (NEB) was added to ligate the DNA, and the sample was incubated at 16 °C for 4-6 hours. After ligation, protease K was added for reverse cross-linking and incubated overnight at 65 °C. DNA fragments were purified and dissolved in water. The non-ligated end was removed subsequently. The length of the purified DNA fragment was 300-500 BP, and the DNA ends were repaired. Finally, we isolated biotin-labeled DNA fragments from Dynabeads® M-280 Streptavidin (Life Technologies). The quality of the HI-C library was controlled and sequenced using an Illumina sequencer.

## 1.2 RNA extraction and sequencing

Six tissues (heart, liver, lung, gut, testis, and kidney) were ground into powder with TRIzol reagent (TIANGEN Biotech Co. Ltd, Beijing, China) on dry ice to extract total RNA. The integrity, concentration, and purity of the RNA were determined using an Agilent 2100 Bioanalyzer (Agilent Technologies, USA), 0.7% agarose gel pulse (Lonza) electrophoresis, and Nanodrop microspectrophotometer (Thermo Fisher Scientific, USA) respectively. Then, we enriched the mRNA using Oligo (dT) 0.5X magnetic beads. After enrichment, the mRNA were fragmented into short fragments by fragmentation buffer, and a cDNA strand was synthesized with random hexamers using mRNA as template. The buffer, dNTPs, DNA polymerase I and RNase H were added to synthesize two-stranded cDNA. Subsequently, AMPure XP Beads were used to purify double-stranded cDNA and the PCR products to obtain the final library. Finally, the quality of the library was controlled and sequenced using an Illumina sequencer.

## 1.3 Genome characteristics estimation

A DNA library of small fragments was constructed based on the characteristics of the genome using the genome-wide shotgun method (WGS). Whole-genome sequencing data were obtained through paired-end sequencing. Then, fastp 0.19.4 (<https://github.com/OpenGene/fastp>) software (-n 0 -f 5 -F 5 -t 5 -T 5) was used to filter the original data to obtain clean data. The filtering criteria included deleting the adapter sequence reads, intercepting the inaccurate sequencing bases at both ends of the reads, removing the reads containing N bases, and discarding the corresponding pair of reads when more than 20% of the basic mass fraction of the read was less than 20.

We used the k-mer analysis method to estimate genomic size and heterozygosity to estimate genomic characteristics from the read information obtained by sequencing. Different k-mer frequencies were obtained by processing reads with Jellyfish v0.20.0 (Marcais and Kingsford, 2011), and the genome size was estimated using the corresponding software (Find GSE, Genome scope). Kmerfreq uses its own algorithm to cut the K-mer (K-mer =19). The genome size was estimated using the K-mer frequency distribution (Luo et al., 2012).

## 1.4 De novo assembly, assessment and systemy analysis of the *Vulpes ferrilata* genome

After quality control, the filtered reads were used for pure third-generation assembly, and the genome was assembled using NextDenovo v2.0-beta.1 (READS\_cutoff: 1 K, SEED\_Cutoff: 25 K), which was mainly divided into three steps: first, the NextCorrect module was used to correct the original data and obtain a consistent sequence (CNS sequence) after the correction. Then, the NextGraph module was used for genome assembly of the corrected reads to obtain the preliminary assembly of the genome. Finally, the original third-generation and second-generation data were successively used for genome correction by Racon v1.3.1 and Nextpolish v1.0.5 (default third-generation data were corrected three times and second-generation data were corrected four times), and the polished genome was obtained. BUSCO assessment refers to the assessment of genomic integrity at the level of gene content

(Simão et al., 2015). For genome assembly evaluation, tBLASTn (Schffer et al., 2006) was compared with the corresponding BUSCO database sequences to identify candidate regions, Augustus software (Stanke et al., 2008) was used for gene structure prediction, and HMMER3 (Jaina et al., 2013) was used for comparison to assess its integrity. If the match length is within the expected range of the BUSCO profile match length, it is classified as "done." If they are found more than once, they are classified as "repeated." Matches that are only partially recovered are classified as "fragments" and those that are not are classified as "missing." The genome was evaluated based on default parameters using BUSCO through the BUSCO single-copy gene database (mammalia\_odb10). CEGMA (Genis et al., 2007) evaluation is based on a conserved protein family set (248 core genes) that exists in a large number of eukaryotes, and evaluates the assembled genome and the accuracy and integrity of the core genes within this genome. Using CEGMA v2 (default), the program uses information from the core genes of six model organisms to first identify candidate regions in the new genome using tBLASTn (Schffer et al., 2006). The system uses a profile of each core gene to ensure the reliability of the final prediction of the gene structure. Sequence consistency assessments aim to use high-quality second-generation sequencing data to assess the accuracy of third-generation sequencing data assembly results at the single-base level. The sources of single-base variation in third-generation sequencing data include:(1) real single-base variation, and (2) single base variation caused by sequencing error. When a single base variation caused by a sequencing error exists in the reference genome, it will be identified as a homozygous single-base variation when detecting single-base variations using second-generation sequencing data. Therefore, the final version of the genome assembled by the third-generation data can be used as the reference genome, single-base variation can be detected by the second-generation data, and the homozygous single-base variation rate can be used as the error rate of the assembly result. BWA 0.7.12-r1039, samtools v1.4, and bcftools v1.8.0 were used to detect the single base variation. The main process is divided into three steps: (1) The final genome assembled by three generations of data was used as the reference genome in BWA 0.7.12-r1039 analysis (Li et al., 2013). The software compared the filtered second-generation data (FASTP: -N 0 for second-generation data filtering) with the default parameters of MEM mode to the reference genome to obtain the comparison file; (2) SAMtools (Li et al., 2009) and bcftools (Danecek et al., 2017) were used to obtain the VCF file of the variation result; (3) the number of homozygous single base variations in VCF files were counted and the homozygous single base variation rate (number of homozygous single base variation/total number of genome bases) calculated. For systematic analysis, all protein sequences were aligned using blastp (Jacob et al., 2008). Synteny was then found using MCScanX (Wang et al., 2012). Finally, a circle figure was displayed using Circos (Krzywinski et al., 2009).

### **1.5 Chromosome assembly by Hi-C data**

HIC Pro v2.8.1, a previous research achievement generated from the libraries, was used to control the quality of Hi-C raw data. Then, the low-quality sequences (quality scores < 20), adaptor sequences, and sequences shorter than 30 bp were filtered out

using fastp (-end-to-end -very-sensitive -L 30), and bowtie2 was used to map the clean paired-end reads to the draft assembled sequence to obtain the unique mapped paired-end reads (Chen et al., 2018; Langmead and Salzberg, 2012). Next, valid interactive paired reads from uniquely mapped paired-end reads were identified and retained by HIC-pro v2.8.1 to further analyze and filter invalid read pairs, including dangling-end, self-cycle, re-ligation, and dumped products. The obtained scaffolds were further aggregated and ordered, and the scaffolds were oriented to chromosomes using LACHESIS (<https://github.com/shendurelab/LACHESIS>). The following parameters were used for the analyses: CLUSTER\_MIN\_RE\_SITES=100, CLUSTER\_MAX\_LINK\_DENSITY=2.5, CLUSTER\_NONINFORMATIVE\_RATIO=1.4, ORDER\_MIN\_N\_RES\_IN\_TRUNK=60, ORDER\_MIN\_N\_RES\_IN\_SHREDS=60. Finally, the positioning errors were adjusted manually, which showed distinct patterns of discrete chromatin interactions (Burton et al., 2013).

### 1.6 Repeat annotation

Firstly, GMATA v2.2 (default) (Wang and Wang, 2016) and Tandem Repeats Finder 4.07b (2 7 7 80 10 50 500 -f -d -h -r) (Benson, 1999) software were used to identify the simple repeat sequences (SSRs) and recognize and annotate all tandem repeat elements (TRs) in the whole genome. Transposable elements (TEs) were identified by a combination of ab initio and homology-based methods in the *V. ferrilata* genome. Briefly, an ab initio repeat library was predicted by MITE-hunter (-n 20 -P 0.2 -c 3) (Han and Wessler, 2010) and Repeat Modeler version open-1.0.11 (-engine wublast) (Bedell et al., 2000) with default parameters. The obtained library was aligned using TEclass Repbase (Jurka et al., 2005) to classify the types of repetitive families. Repeat Masker 1.331 (nolow -no\_is -gff -norna -engine abblast -lib lib) was also used to search for known and new TEs for further identification of repeats throughout the genome by mapping sequences against the de novo repeat library and Repbase TE library. The overlapping transposable elements belonging to the same repeat class were sorted and combined.

### 1.7 Gene prediction

Three independent methods: ab initio prediction, homology search, and transcriptome prediction, were used for gene prediction. We used GeMoMa v1.6.1 (Keilwagen et al., 2016) to conduct a homology search and obtain gene structure information by aligning homologous proteins from related species. For RNAseq-based gene prediction, STAR 2.7.3a (--outWigType bedGraph --outSAMtype BAM SortedByCoordinate --outSAMstrandField intronMotif) was used to align the filtered RNA-seq with the reference genome. PASA 2.3.3 (-c alignAssembly.config -C -R -g genome.fasta -T -u trans.fasta -t trans.clean.fasta -f fl.acc --CPU 10 --ALIGNERS gmap) (Haas et al., 2008) was used to predict transcripts composed of stringtie v1.3.4d and open reading frames (ORFs) after alignment. We used Augustus v3.3.1 (--gff3=on --hintsfile=hints.gff --extrinsicCfgFile=extrinsic.cfg --allow\_hinted\_splicesites=gcag,atac --min\_intron\_len=30 --softmasking=1) (Stanke et al., 2008) with the training set produced by RNA-seq reads to predict the ab initio gene. Then, EvidenceModeler v1.1.1 (--segmentSize 1000000 --overlapSize 100000) was used to generate a complete gene set. We used PASA 2.3.3 to compare the

transcripts to the genomes, and to predict the UTR and variable spliced regions of the original gene set based on transcriptome data. Finally, we used the TransposonPSI package (<http://transposonpsi.sourceforge.net/>) to remove the gene with TE and filter the miscoded genes (Urasaki et al., 2016).

### **1.8 Functional annotation of gene models**

Gene functional information, motif, and domain were determined by comparison with public databases, such as Gene Ontology, KOG, KEGG, NR, and SWISSPORT. The GO terms were determined using the InterProScan 5.32-71.0 with default parameters (Zdobnov and Apweiler, 2001). We used BLASTP v2.7.1 (-max\_target\_seqs 1, -evalue 1e-5) to compare the integrated protein sequences with the other four public protein databases. The E cut-off value was 1e-05, while the hit result with the lowest E value was retained. The results of the five database searches were concatenated.

### **1.9 Annotation of non-coding RNAs (ncRNAs)**

There are two strategies to obtain ncRNA: database retrieval and model prediction. The tRNAscan-SE v2.0 (--thread 4 -E -I) with eukaryote parameters was used to predict transfer RNAs (tRNAs) (Lowe and Eddy, 1997). We searched for microRNA, rRNA, small nuclear RNA, and small nucleolar RNA in the Rfam database using Infernal cmscan 5.32-71.0 (Nawrocki and Eddy, 2013; Griffiths-Jones, 2004). We used RNAmmer v1.2 (-S euk -m lsu,ssu,tsu -gff) to predict rRNAs and their subunits (Lagesen et al., 2007).

### **1.10 Identification of homologous and orthologous gene set**

The homologous relationships between *V. ferrilata* and other assessed species (*Ailuropoda melanoleuca*, *Canis lupus*, *Enhydra lutris*, *Felis catus*, *Homo sapiens*, *Leptonychotes weddel*, *Mus musculus*, *Mustela putorius*, *Panthera tigris*, *Vulpes vulpes*) were confirmed by aligning the protein sequences using OrthMCL v2.0.9 (percentMatchCutoff=50 evalueExponentCutoff=-5) (Li and Stoeckert, 2003). Specifically, the prematurely terminated and miscoded genes of the protein sets collected from 10 sequenced species were filtered, and the longest transcript of each gene was retained. Then, the extracted protein sequences were aligned in pairs, and BLASTP 2.6.0+ was set to the E value threshold ( $\leq 1 \times 10^{-5}$ ) to identify conserved homologous genes. OrthMCL was used to further identify homologous gene pairs, single-copy gene pairs, and paralogous intra-genome gene pairs. Finally, we identified the unique genes of *V. ferrilata* and the unclustered genes that exhibited no homologs as species-specific genes. The species-specific genes were further enriched, and their functions were annotated using the information on homologs in the Kyoto Encyclopedia of Genes and Genomes (KEGG) and Gene Ontology (<http://www.geneontology.org/>) databases.

### **1.11 Phylogenetic analyses**

Based on the orthologous gene set, single-copy genes were used for molecular phylogenetic analysis. Mafft v7.313 (linsi) was used for multiple alignments of the coding sequences, and the ortholog group obtained from single-copy families (Katoh and Standley, 2013). Gblocks 0.91b (-t=p -b5=h) (Castresana et al., 2000) and RAXML 8.2.10 (-m PROTGAMMAAUTO -p 12345 -T 8 -f b) (Stamatakis et al., 2006) was used for low alignment sequence deletion and phylogenetic tree

construction. Gblocks (Castresana, 2000) and the GTRGAMMA substitution model of RAxML (Stamatakis et al., 2006) were used to eliminate the poorly aligned sequences and construct the phylogenetic tree respectively. The generated tree file was displayed with Figtree 1.4.4 and MEGA 10.1.8. Based on the phylogenetic tree, we used Real-time of Mega-CC to estimate the time of species differentiation by calculating the mean substitution rate of each branch (Kumar et al., 2012). We obtained six fossil calibration dates from the Timetree database (<http://www.timetree.org/>) as time controls.

### **1.12 Gene family expansion and contraction analysis**

The significant expansion or contraction of specific gene families is usually related to the adaptive differentiation of related species. The expansion and contraction of homologous gene families was detected by CAFE v4.2.1 (-p 0.05 -t 10 -r 10000) based on the results of Orthomcl, which uses birth and death processes to simulate gene gains and losses during phylogeny (Bie et al., 2006). For gene enrichment analysis of GO and KEGG pathways, the total gene dataset was used as the background, and the targeted genes searched the background and constructed the enriched pathway and GO terms using clusterProfiler (Yu et al., 2012).

### **1.13 Genes under positive selection**

Genes with natural selection signatures can be identified by the ratio of the non-synonymous substitution rate ( $k_a$ ) to the synonymous substitution rate ( $k_s$ ) of protein-coding genes, according to the theory of neutral molecular evolution. Therefore, the average  $K_a/K_s$  values were calculated, and CodeML implemented in PAML Version 4.8 (Yang, 2007) was used to test the likely ratio of branching sites to determine the positive selection genes in the *V. ferrilata* genome. The genes with  $p < 0.05$  were positive selection genes.

## **References**

- Bedell JA, Korf I, Gish W. 2000. MaskerAid: a performance enhancement to RepeatMasker. *Bioinformatics*, **16**(11): 1040-1041. doi: 10.1093/bioinformatics/btt509
- Benson G. 1999. Tandem repeats finder: a program to analyze DNA sequences. *Nucleic Acids Research*, **27**(2): 573-580. doi: 10.1093/nar/27.2.573
- Bie TD, Cristianini N, Demuth JP, Hahn AMW. 2006. CAFE: a computational tool for the study of gene family evolution. *Bioinformatics*, **22**(10): 1269-1271. doi: 10.1093/bioinformatics/btl097
- Burton JN, Adey A, Patwardhan RP, Qiu R, Kitzman JO, Shendure J, et al. 2013. Chromosome-scale scaffolding of de novo genome assemblies based on chromatin interactions. *Nature Biotechnology*, **31**(12): 1119-1125. doi: 10.1038/nbt.2727
- Castresana J. 2000. Selection of conserved blocks from multiple alignments for their use in phylogenetic analysis. *Molecular biology and evolution*, **17**(4): 540-552. doi: 10.1093/oxfordjournals.molbev.a026334
- Chen S, Zhou Y, Chen Y. 2018. fastp: an ultra-fast all-in-one FASTQ preprocessor. *Bioinformatics*, **34**(17): i884-i890. doi: 10.1101/274100
- Danecek P, McCarthy SA. 2017. BCFtools/csq: Haplotype-aware variant consequences. doi: 10.1101/090811
- Genis P, Keith B, Ian K. 2007. CEGMA: a pipeline to accurately annotate core genes in eukaryotic

- genomes. *Bioinformatics*, **23**(9): 1061-1067. doi: 10.1093/bioinformatics/btm071
- Griffiths-Jones S. 2004. Rfam: annotating non-coding RNAs in complete genomes. *Nucleic Acids Research*, **33**(Database issue): D121-D124. doi: 10.1093/nar/gki081
- Haas BJ, Salzberg SL, Zhu W, Pertea M, Allen JE, Orvis J, et al. 2008. Automated eukaryotic gene structure annotation using EVIDENCEModeler and the Program to Assemble Spliced Alignments. *Genome biology*, **9**(1): R7. doi: 10.1186/gb-2008-9-1-r7
- Han Y, Wessler SR. 2010. MITE-Hunter: a program for discovering miniature inverted-repeat transposable elements from genomic sequences. *Nucleic Acids Research*, **38**(22): e199. doi: 10.1093/nar/gkq862
- Jacob A, Lancaster J, Buhler J, Harris B, Chamberlain R.D. 2008. Mercury blastp: accelerating protein sequence alignment. *Acm Transactions on Reconfigurable Technology & Systems*, **1**(2), 1-44. doi: 10.1145/1371579.1371581
- Jaina M, Finn RD, Eddy SR, Alex B, Marco P. 2013. Challenges in homology search: hmmer3 and convergent evolution of coiled-coil regions. *Nucleic Acids Research*, **41**(12), e121-e121. doi: 10.1093/nar/gkt263
- Jurka J, Kapitonov VV, Pavlicek A, Klonowski P, Kohany O, Walichiewicz J, et al. 2005. Repbase Update, a database of eukaryotic repetitive elements. *Cytogenetic and Genome Research*, **110**(1-4): 462-467. doi: 10.1159/000084979
- Katoh K, Standley DM. 2013. MAFFT Multiple Sequence Alignment Software Version 7: Improvements in Performance and Usability. *Molecular Biology and Evolution*, **30**(4): 772-780. doi: 10.1093/molbev/mst010
- Keilwagen J, Wenk M, Erickson JL, Schattat MH, Grau J, Hartung F, et al. 2016. Using intron position conservation for homology-based gene prediction. *Nucleic Acids Research*, **44**(9): e89. doi: 10.1093/nar/gkw092
- Krzywinski M, Schein J, Birol I, Connors J, Gascoyne R, Horsman D. et al. 2009. Circos: an information aesthetic for comparative genomics. *Genome Research*, **19**(9):1639-45. doi: 10.1101/gr.092759.109
- Kumar S, Stecher G, Peterson D, Tamura K. 2012. MEGA-CC: computing core of molecular evolutionary genetics analysis program for automated and iterative data analysis. *Bioinformatics*, **28**(20): 2685-2686. doi: 10.1093/nar/gkw092
- Langmead B, Salzberg SL. 2012. Fast gapped-read alignment with Bowtie 2. *Nature Methods*, **9**(4): 357-359. doi: 10.1038/nmeth.1923
- Li H, Handsaker B, Wysoker A, Fennell T, Ruan J, Homer N, et al. 2009. The sequence alignment/map format and samtools. *Bioinformatics*, **25**(16), 2078-2079. doi: 10.1093/bioinformatics/btp352
- Li H. 2013. Aligning sequence reads, clone sequences and assembly contigs with bwa-mem. arXiv e-prints.
- Li L, Stoeckert C. 2003. OrthoMCL: Identification of ortholog groups for Eukaryotic genomes. *Genome Research*, **13**(1088-9051/03): 2178-2189. doi: 10.1101/gr.1224503
- Lowe TM, Eddy SR. 1997. tRNAscan-SE: a program for improved detection of transfer RNA genes in genomic sequence. *Nucleic Acids Research*, **25**(5): 955-964. doi: 10.1093/nar/25.5.955
- Luo RB, Liu BH, Xie YL, Li ZY, Wang J. 2012. SOAPdenovo2: an empirically improved memory-efficient short-read de novo assembler. *GigaScience*, **1**(18). doi: 10.1186/2047-217X-1-18
- Marçais G, Kingsford C. 2011. A fast, lock-free approach for efficient parallel counting of occurrences

- of k-mers. *Bioinformatics*, **27**(6): 764 – 770. doi: 10.1093/bioinformatics/btr011
- Nawrocki E, Eddy S. 2013. Infernal 1.1: 100-fold faster RNA homology searches. *Bioinformatics*, **29**(22): 2933-2935. doi: 10.1093/bioinformatics/btt509
- Schffer AA, Richa A, Yu YK, Michael GE, Altschul SF. 2006. Composition-based statistics and translated nucleotide searches: improving the tblastn module of blast. *BMC Biology*, **4**(1):41. doi: 10.1186/1741-7007-4-41
- Simão FA, Waterhouse RM, Panagiotis I, Kriventseva EV, Zdobnov EM. 2015. Busco: assessing genome assembly and annotation completeness with single-copy orthologs. *Bioinformatics*, **(19)**3210-3212. doi: 10.1093/bioinformatics/btv351
- Stanke M, Diekhans M, Baertsch R, Haussler D. 2008. Using native and syntenically mapped cDNA alignments to improve de novo gene finding. *Bioinformatics*, **24**(5): 637-644. doi: 10.1093/bioinformatics/btn013
- Stamatakis A. 2006. RAxML-VI-HPC: maximum likelihood-based phylogenetic analyses with thousands of taxa and mixed models. *Bioinformatics*, **22**(21): 2688-2690. doi: 10.1093/bioinformatics/btl446
- Stewart C, Via LE. 1993. A rapid ctab dna isolation technique useful for rapid fingerprinting and other PCR applications. *Biotechniques*, **14**(5): 748-50.
- Wang X, Wang L. 2016. GMATA: An integrated software package for genome-scale SSR mining, marker development and viewing. *Frontiers in Plant Science*, **13**(7): 1350. doi: 10.3389/fpls.2016.01350
- Wang Y, Tang H, Debarry JD, Tan X, Li J, Wang X, et al. 2012. Mescanx: a toolkit for detection and evolutionary analysis of gene synteny and collinearity. *Nucleic Acids Research*, **40**(7), e49-e49. doi: 10.1093/nar/gkr1293
- Urasaki N, Takagi H, Natsume S, Uemura A, Taniai N, Miyagi N, et al. 2016. Draft genome sequence of bitter melon (*Momordica charantia*), a vegetable and medicinal plant in tropical and subtropical regions. *DNA Research*, **0**(0): 1-8. doi: 10.1093/dnares/dsw047
- Yang Z. 2007. PAML 4: Phylogenetic analysis by maximum likelihood. *Molecular Biology and Evolution*, **24**(8): 1586-1591. doi: 10.1093/molbev/msm088
- Yu G, Wang LG, Han Y, He QY. 2012. ClusterProfiler: an R package for comparing biological themes among gene clusters. *Omics-a Journal of Integrative Biology*, **16**(5), 284-287. doi: 10.1089/omi.2011.0118
- Zdobnov EM, Apweiler R. 2001. InterProScan--an integration platform for the signature-recognition methods in InterPro. *Bioinformatics*, **17**(9): 847-848. doi: 10.1093/bioinformatics/17.9.84



**Supplementary Table S1.** Sequencing statistics generated by different platforms for *Vulpes ferrilata* genome assembly

| Platform | Library size | Raw data (Gb) | Clean data (Gb) | Coverage (X) |
|----------|--------------|---------------|-----------------|--------------|
| MGI      | 400 bp       | 155           | 145             | 58.98        |
| Nanopore | 20 kb        | -             | 253             | 102.73       |
| Hi-C     | 350 bp       | 264           | 252             | 112.8        |
| Toal     | -            | -             | 653             | 274.51       |

**Supplementary Table S2.** Total pass reads information statistic of ONT sequencing platform

| Library ID                   | Total pass reads bases | Mean length | N50 length |
|------------------------------|------------------------|-------------|------------|
| 20200409-NPL1962-P5-PAE64028 | 77,841,186,926         | 16,465      | 22,793     |
| 20200410-NPL1962-P1-PAE66557 | 68,860,710,913         | 16,783      | 23,374     |
| 20200411-NPL1962-P5-PAE67654 | 59,657,248,207         | 16,620      | 23,466     |
| 20200413-NPL1962-P5-PAE68858 | 46,649,723,563         | 15,459      | 22,303     |
| Total                        | 253,008,869,609        | 16,389      | 23,002     |

**Supplementary Table S3.** Statistical analysis of transcriptome sequencing results of six organs

| Sample | Total Reads | Total Bases (bp) | Clean Reads | Clean Bases (bp) | Q20 Rate(%) | Q30 Rate(%) | GC(%) |
|--------|-------------|------------------|-------------|------------------|-------------|-------------|-------|
| Gut    | 47,301,306  | 7,095,195,900    | 46,908,360  | 7,020,363,082    | 96.91       | 91.51       | 46.55 |
| Heart  | 70,892,810  | 10,633,921,500   | 70,408,436  | 10,512,563,558   | 98.64       | 95.57       | 47.57 |
| Kidney | 48,578,428  | 7,286,764,200    | 48,165,658  | 7,209,562,145    | 96.94       | 91.58       | 47.61 |
| Liver  | 45,734,350  | 6,860,152,500    | 45,352,874  | 6,761,981,620    | 97.25       | 92.32       | 48.29 |
| Lung   | 47,522,488  | 7,128,373,200    | 47,053,648  | 7,027,857,700    | 97.14       | 92.14       | 47.69 |
| Spleen | 50,878,684  | 7,631,802,600    | 50,347,522  | 7,509,082,471    | 97.04       | 91.91       | 47.77 |

**Supplementary Table S4.** Statistics of assembly results

---

| Stat type   | Preliminary Assembly |               | Polish genome |               |
|-------------|----------------------|---------------|---------------|---------------|
|             | Contig length        | Contig number | Contig length | Contig number |
| N50         | 61,004,393 bp        | 14            | 61,591,022    | 14            |
| Longest     | 130,478,765 bp       | 1             | 131,792,797   | 1             |
| Total       | 2,354,730,612        | 359           | 2,379,644,749 | 359           |
| Length>=1kb | 2,354,730,612        | 359           | 2,379,644,749 | 359           |
| Length>=2kb | 2,354,730,612        | 359           | 2,379,644,749 | 359           |
| Length>=5kb | 2,354,730,612        | 359           | 2,379,644,749 | 359           |

---

**Supplementary Table S5.** BUSCO Predictive Statistics

| Type                                   | Number | Percent (%) |
|----------------------------------------|--------|-------------|
| Complete BUSCOs (C)                    | 8,558  | 92.76       |
| Complete and single-copy<br>BUSCOs (S) | 8,477  | 91.88       |
| Complete and duplicated<br>BUSCOs (D)  | 81     | 0.88        |
| Fragmented BUSCOs (F)                  | 159    | 1.72        |
| Missing BUSCOs (M)                     | 509    | 5.52        |
| Total BUSCO groups<br>searched         | 9,226  | 100.00      |

**Supplementary Table S6.** Genome single base accuracy statistics

| Depth(X)   | Hetero<br>SNP | Hetero<br>Indel | Homo<br>SNP | Error<br>rate by<br>Homo<br>SNP(%) | Homo<br>Indel | Error<br>rate by<br>Homo<br>Indel(%) | Error rate<br>by homo<br>variants(%) | Accuracy<br>of<br>genome(%) |
|------------|---------------|-----------------|-------------|------------------------------------|---------------|--------------------------------------|--------------------------------------|-----------------------------|
| depth>=1x  | 2,099,929     | 752,271         | 12,016      | 0.000505                           | 35,212        | 0.00148                              | 0.001985                             | 99.998015                   |
| depth>=5x  | 2,098,745     | 749,377         | 8,282       | 0.000348                           | 29,587        | 0.001243                             | 0.001591                             | 99.998409                   |
| depth>=10x | 2,093,224     | 734,593         | 6,508       | 0.000273                           | 22,588        | 0.000949                             | 0.001223                             | 99.998777                   |

**Supplementary Table S7.** Chromosome and reference genome corresponding chromosome statistical results

---

| Chr   | Size(bp)      | Contig Num |
|-------|---------------|------------|
| LG01  | 203,316,443   | 6          |
| LG02  | 166,046,677   | 20         |
| LG03  | 157,658,846   | 7          |
| LG04  | 157,089,576   | 7          |
| LG05  | 136,349,340   | 3          |
| LG06  | 135,942,581   | 22         |
| LG07  | 134,372,329   | 3          |
| LG08  | 133,959,777   | 8          |
| LG09  | 126,600,798   | 9          |
| LG10  | 125,059,525   | 28         |
| LG11  | 122,981,691   | 9          |
| LG12  | 122,878,232   | 5          |
| LG13  | 122,537,276   | 3          |
| LG14  | 119,274,077   | 6          |
| LG15  | 118,459,051   | 9          |
| LG16  | 113,145,118   | 5          |
| LG17  | 80,532,236    | 4          |
| LG18  | 64,503,012    | 3          |
| Total | 2,340,706,585 | 157        |

---

**Supplementary Table S8.** Hi-C assembly result statistics

| Stat Type   | Scaffold Length | Scaffold Number | Contig Length | Contig Number | Gap Length | Gap Number |
|-------------|-----------------|-----------------|---------------|---------------|------------|------------|
| N50         | 133,960,477     | 8               | 53,181,253    | 17            | 100        | 70         |
| N60         | 125,062,225     | 10              | 42,800,000    | 22            | 100        | 84         |
| N70         | 122,878,632     | 12              | 35,421,494    | 28            | 100        | 98         |
| N80         | 119,274,577     | 14              | 25,832,893    | 36            | 100        | 112        |
| N90         | 113,145,518     | 16              | 17,393,552    | 47            | 100        | 126        |
| Longest     | 203,316,943     | 1               | 116,451,844   | 1             | 100        | 1          |
| Total       | 2,379,658,649   | 234             | 2,379,644,749 | 373           | 13,900     | 139        |
| Length>=1kb | 2,379,658,649   | 234             | 2,379,644,749 | 373           | 0          | 0          |
| Length>=2kb | 2,379,658,649   | 234             | 2,379,644,749 | 373           | 0          | 0          |
| Length>=5kb | 2,379,658,649   | 234             | 2,379,644,749 | 373           | 0          | 0          |



**Supplementary Table S9.** Statistical results of TE repeat sequences

| Class          | Order    | Super family   | Number of elements | Length of sequence(bp) | Percentage of sequence(%) |       |
|----------------|----------|----------------|--------------------|------------------------|---------------------------|-------|
| Class I        | LTR      |                | 2726505            | 702457281              | 29.52                     |       |
|                |          | ERVL-MaLR      | 181392             | 47419317               | 1.99                      |       |
|                |          | Unknown        | 218195             | 28274984               | 1.19                      |       |
|                |          | ERV1           | 111836             | 28871158               | 1.21                      |       |
|                |          | Gypsy          | 43818              | 3989130                | 0.17                      |       |
|                |          | ERVL           | 124921             | 37980651               | 1.6                       |       |
|                |          | Other          | 31748              | 1509099                | 0.06                      |       |
|                |          | SINE           |                    | 860533                 | 115207788                 | 4.84  |
|                | LINE     | B2             | 337234             | 46190669               | 1.94                      |       |
|                |          | Unknown        | 228526             | 32344796               | 1.36                      |       |
|                |          | MIR            | 246348             | 34717533               | 1.46                      |       |
|                |          | Other          | 48425              | 1954790                | 0.08                      |       |
|                |          | L2             | 201606             | 37380859               | 1.57                      |       |
|                |          | L1             | 874870             | 390958759              | 16.43                     |       |
|                |          | CR1            | 25815              | 3955075                | 0.17                      |       |
|                |          | Unknown        | 7284               | 2914002                | 0.12                      |       |
|                | Class II | DNA            | Other              | 44487                  | 3996459                   | 0.17  |
|                |          |                |                    | 682507                 | 78353408                  | 3.29  |
|                |          |                | hAT-Charlie        | 190224                 | 31863352                  | 1.34  |
|                |          |                | hAT-Tip100         | 53841                  | 8505619                   | 0.36  |
| Unknown        |          |                | 40663              | 2447469                | 0.1                       |       |
| TcMar-Tigger   |          |                | 59814              | 15052314               | 0.63                      |       |
| RC             |          | Other          | 320473             | 19502450               | 0.82                      |       |
|                |          |                | 17492              | 982204                 | 0.04                      |       |
|                |          | Other          | 17492              | 982204                 | 0.04                      |       |
|                |          | Total TEs      |                    | 3409012                | 780810689                 | 32.81 |
|                |          | Tandem Repeats |                    | 475481                 | 18348581                  | 0.77  |
|                |          | tandem_repeat  |                    | 242635                 | 15340903                  | 0.64  |
| SSR            |          | 232846         | 3007678            | 0.13                   |                           |       |
| Other          |          | 613241         | 90970079           | 3.82                   |                           |       |
| Unknown        |          | 20339          | 3901317            | 0.16                   |                           |       |
| Simple repeats |          | 25742          | 4587768            | 0.19                   |                           |       |
| Low complexity |          | 1446           | 242363             | 0.01                   |                           |       |

---

|              |         |           |       |
|--------------|---------|-----------|-------|
| TotalRepeats | 4545261 | 898860797 | 37.77 |
|--------------|---------|-----------|-------|

---

**Supplementary Table S10.** Protein-coding gene annotation statistics

| Gene set            | Total number of genes | Average gene length(bp) | Average CDS length(bp) | Average exons number per gene | Average exon length(bp) | Average intron length(bp) |
|---------------------|-----------------------|-------------------------|------------------------|-------------------------------|-------------------------|---------------------------|
| <i>V. ferrilata</i> | 21,715                | 32,053.47               | 1,330.64               | 7.53                          | 176.75                  | 4,706.1                   |

**Supplementary Table S11.** Gene functional annotation statistics based on gene functional annotation results from different databases

| Type       | Number    | Percent (%) |       |
|------------|-----------|-------------|-------|
|            | Swissprot | 18,358      | 84.54 |
|            | KEGG      | 13,661      | 62.91 |
| Annotation | KOG       | 12,520      | 57.66 |
|            | GO        | 12,495      | 57.54 |
|            | NR        | 18,580      | 85.56 |
| Total      | Annotated | 18,776      | 86.47 |
|            | Gene      | 21,715      | -     |

**Supplementary Table S12.** Non-coding RNA annotation statistics

| Type             | Copy Number             | Average Length(bp) | Total Length(bp) | Percentage of sequence(%) |        |
|------------------|-------------------------|--------------------|------------------|---------------------------|--------|
| rRNA<br>(295)    | 18S                     | 17                 | 1,884.12         | 32,030                    | 0.0013 |
|                  | 28S                     | 17                 | 6,951.35         | 118,173                   | 0.005  |
|                  | 5.8S                    | 15                 | 152.6            | 2,289                     | 0.0001 |
|                  | 5S                      | 246                | 111.67           | 27,471                    | 0.0012 |
| miRNA<br>(3,788) | snRNA                   | 560                | 109.57           | 61,358                    | 0.0026 |
|                  | miRNA                   | 1,068              | 78.11            | 83,424                    | 0.0035 |
|                  | spliceosomal            | 1,600              | 118.01           | 188,818                   | 0.0079 |
|                  | other                   | 560                | 229.32           | 128,417                   | 0.0054 |
| Regulatory       | cis-regulatory elements | 585                | 65.85            | 38,524                    | 0.0016 |
| tRNA             | tRNA                    | 143,320            | 82.76            | 11,861,506                | 0.4985 |

**Supplementary Table S13.** 67 significantly over-represented KEGG pathways

| ID       | Description                                     | Gene Ratio | Bg Ratio | pvalue   | padj     | Count |
|----------|-------------------------------------------------|------------|----------|----------|----------|-------|
| map04966 | Collecting duct acid secretion                  | 44/135     | 76/7235  | 6.28E-59 | 5.65E-57 | 44    |
| map04145 | Phagosome                                       | 56/135     | 237/7235 | 4.36E-49 | 1.96E-47 | 56    |
| map04721 | Synaptic vesicle cycle                          | 44/135     | 132/7235 | 2.62E-45 | 7.85E-44 | 44    |
| map00190 | Oxidative phosphorylation                       | 44/135     | 195/7235 | 5.88E-37 | 1.32E-35 | 44    |
| map04150 | mTOR signaling pathway                          | 44/135     | 221/7235 | 2.02E-34 | 3.64E-33 | 44    |
| map04213 | Longevity regulating pathway - multiple species | 19/135     | 93/7235  | 3.49E-15 | 5.23E-14 | 19    |
| map00710 | Carbon fixation in photosynthetic organisms     | 21/135     | 136/7235 | 4.11E-14 | 5.29E-13 | 21    |
| map00010 | Glycolysis / Gluconeogenesis                    | 21/135     | 178/7235 | 9.15E-12 | 9.15E-11 | 21    |
| map01230 | Biosynthesis of amino acids                     | 21/135     | 178/7235 | 9.15E-12 | 9.15E-11 | 21    |
| map04623 | Cytosolic DNA-sensing pathway                   | 12/135     | 57/7235  | 3.77E-10 | 3.39E-09 | 12    |
| map04915 | Estrogen signaling pathway                      | 19/135     | 176/7235 | 4.63E-10 | 3.79E-09 | 19    |
| map04066 | HIF-1 signaling pathway                         | 21/135     | 224/7235 | 7.28E-10 | 5.46E-09 | 21    |
| map04612 | Antigen processing and presentation             | 13/135     | 80/7235  | 2.02E-09 | 1.40E-08 | 13    |
| map04622 | RIG-I-like receptor signaling pathway           | 12/135     | 66/7235  | 2.27E-09 | 1.46E-08 | 12    |
| map01200 | Carbon metabolism                               | 21/135     | 252/7235 | 6.25E-09 | 3.75E-08 | 21    |
| map04611 | Platelet activation                             | 15/135     | 144/7235 | 5.85E-08 | 3.19E-07 | 15    |
| map04217 | Necroptosis                                     | 17/135     | 188/7235 | 6.02E-08 | 3.19E-07 | 17    |
| map04913 | Ovarian steroidogenesis                         | 10/135     | 59/7235  | 1.06E-07 | 5.29E-07 | 10    |
| map04620 | Toll-like receptor signaling pathway            | 12/135     | 96/7235  | 1.79E-07 | 8.48E-07 | 12    |

|              |                                                    |        |          |          |          |    |
|--------------|----------------------------------------------------|--------|----------|----------|----------|----|
| map0<br>4650 | Natural killer cell<br>mediated cytotoxicity       | 12/135 | 98/7235  | 2.26E-07 | 1.02E-06 | 12 |
| map0<br>1120 | Microbial metabolism<br>in diverse<br>environments | 21/135 | 318/7235 | 3.54E-07 | 1.52E-06 | 21 |
| map0<br>4918 | Thyroid hormone<br>synthesis                       | 11/135 | 85/7235  | 4.18E-07 | 1.71E-06 | 11 |
| map0<br>4923 | Regulation of<br>lipolysis in adipocytes           | 10/135 | 75/7235  | 1.08E-06 | 4.24E-06 | 10 |
| map0<br>4540 | Gap junction                                       | 13/135 | 142/7235 | 2.08E-06 | 7.81E-06 | 13 |
| map0<br>4921 | Oxytocin signaling<br>pathway                      | 15/135 | 190/7235 | 2.18E-06 | 7.83E-06 | 15 |
| map0<br>4720 | Long-term<br>potentiation                          | 10/135 | 82/7235  | 2.50E-06 | 8.66E-06 | 10 |
| map0<br>4927 | Cortisol synthesis and<br>secretion                | 10/135 | 83/7235  | 2.80E-06 | 9.33E-06 | 10 |
| map0<br>4976 | Bile secretion                                     | 10/135 | 84/7235  | 3.13E-06 | 1.01E-05 | 10 |
| map0<br>1130 | Biosynthesis of<br>antibiotics                     | 21/135 | 377/7235 | 5.58E-06 | 1.73E-05 | 21 |
| map0<br>4141 | Protein processing in<br>endoplasmic<br>reticulum  | 15/135 | 206/7235 | 5.94E-06 | 1.78E-05 | 15 |
| map0<br>4971 | Gastric acid secretion                             | 10/135 | 91/7235  | 6.52E-06 | 1.89E-05 | 10 |
| map0<br>4970 | Salivary secretion                                 | 10/135 | 95/7235  | 9.62E-06 | 2.71E-05 | 10 |
| map0<br>4714 | Thermogenesis                                      | 17/135 | 283/7235 | 1.81E-05 | 4.94E-05 | 17 |
| map0<br>4727 | GABAergic synapse                                  | 10/135 | 103/7235 | 1.98E-05 | 5.09E-05 | 10 |
| map0<br>4972 | Pancreatic secretion                               | 10/135 | 103/7235 | 1.98E-05 | 5.09E-05 | 10 |
| map0<br>4630 | Jak-STAT signaling<br>pathway                      | 12/135 | 150/7235 | 2.10E-05 | 5.24E-05 | 12 |
| map0<br>4911 | Insulin secretion                                  | 10/135 | 104/7235 | 2.15E-05 | 5.24E-05 | 10 |
| map0<br>4270 | Vascular smooth<br>muscle contraction              | 12/135 | 151/7235 | 2.24E-05 | 5.31E-05 | 12 |
| map0<br>4912 | GnRH signaling<br>pathway                          | 10/135 | 106/7235 | 2.55E-05 | 5.88E-05 | 10 |
| map0<br>4015 | Rap1 signaling<br>pathway                          | 15/135 | 235/7235 | 2.89E-05 | 6.50E-05 | 15 |

|              |                                                           |        |          |                 |                 |    |
|--------------|-----------------------------------------------------------|--------|----------|-----------------|-----------------|----|
| map0<br>4621 | NOD-like receptor<br>signaling pathway                    | 12/135 | 160/7235 | 4.00E-05        | 8.77E-05        | 12 |
| map0<br>4926 | Relaxin signaling<br>pathway                              | 11/135 | 136/7235 | 4.24E-05        | 9.09E-05        | 11 |
| map0<br>4713 | Circadian entrainment                                     | 10/135 | 113/7235 | 4.45E-05        | 9.09E-05        | 10 |
| map0<br>4925 | Aldosterone synthesis<br>and secretion                    | 10/135 | 113/7235 | 4.45E-05        | 9.09E-05        | 10 |
| map0<br>4211 | Longevity regulating<br>pathway                           | 10/135 | 114/7235 | 4.80E-05        | 9.59E-05        | 10 |
| map0<br>4750 | Inflammatory<br>mediator regulation of<br>TRP channels    | 10/135 | 115/7235 | 5.17E-05        | 0.000101<br>176 | 10 |
| map0<br>4914 | Progesterone-mediate<br>d oocyte maturation               | 10/135 | 118/7235 | 6.45E-05        | 0.000123<br>468 | 10 |
| map0<br>4916 | Melanogenesis                                             | 10/135 | 119/7235 | 6.93E-05        | 0.000129<br>918 | 10 |
| map0<br>4725 | Cholinergic synapse                                       | 10/135 | 124/7235 | 9.82E-05        | 0.000180<br>358 | 10 |
| map0<br>4210 | Apoptosis                                                 | 12/135 | 185/7235 | 0.00016<br>2641 | 0.000287<br>117 | 12 |
| map0<br>4060 | Cytokine-cytokine<br>receptor interaction                 | 14/135 | 243/7235 | 0.00016<br>27   | 0.000287<br>117 | 14 |
| map0<br>4371 | Apelin signaling<br>pathway                               | 11/135 | 159/7235 | 0.00017<br>4818 | 0.000293<br>575 | 11 |
| map0<br>4724 | Glutamatergic<br>synapse                                  | 10/135 | 133/7235 | 0.00017<br>6145 | 0.000293<br>575 | 10 |
| map0<br>4928 | Parathyroid hormone<br>synthesis, secretion<br>and action | 10/135 | 133/7235 | 0.00017<br>6145 | 0.000293<br>575 | 10 |
| map0<br>4261 | Adrenergic signaling<br>in cardiomyocytes                 | 11/135 | 170/7235 | 0.00031<br>3803 | 0.000513<br>496 | 11 |
| map0<br>4114 | Oocyte meiosis                                            | 10/135 | 152/7235 | 0.00051<br>8554 | 0.000833<br>39  | 10 |
| map0<br>4723 | Retrograde<br>endocannabinoid<br>signaling                | 10/135 | 157/7235 | 0.00066<br>8933 | 0.001056<br>211 | 10 |
| map0<br>4745 | Phototransduction -<br>fly                                | 5/135  | 43/7235  | 0.00114<br>3916 | 0.001775<br>042 | 5  |
| map0<br>0230 | Purine metabolism                                         | 10/135 | 172/7235 | 0.00134<br>9948 | 0.002059<br>242 | 10 |
| map0<br>4072 | Phospholipase D<br>signaling pathway                      | 10/135 | 174/7235 | 0.00147<br>3004 | 0.002209<br>506 | 10 |
| map0         | cGMP-PKG signaling                                        | 10/135 | 185/7235 | 0.00232         | 0.003428        | 10 |



|      |                     |        |          |         |          |    |
|------|---------------------|--------|----------|---------|----------|----|
| 4022 | pathway             |        |          | 3658    | 348      |    |
| map0 | Chemokine signaling | 10/135 | 189/7235 | 0.00271 | 0.003943 | 10 |
| 4062 | pathway             |        |          | 6862    | 832      |    |
| map0 | Spliceosome         | 9/135  | 170/7235 | 0.00438 | 0.006269 | 9  |
| 3040 |                     |        |          | 8317    | 024      |    |
| map0 | Calcium signaling   | 10/135 | 208/7235 | 0.00537 | 0.007555 | 10 |
| 4020 | pathway             |        |          | 3021    | 811      |    |
| map0 | cAMP signaling      | 10/135 | 233/7235 | 0.01157 | 0.016021 | 10 |
| 4024 | pathway             |        |          | 1186    | 642      |    |
| map0 | Hippo signaling     | 5/135  | 87/7235  | 0.02293 | 0.031269 | 5  |
| 4391 | pathway - fly       |        |          | 0896    | 404      |    |
| map0 | Adherens junction   | 5/135  | 90/7235  | 0.02610 | 0.035066 | 5  |
| 4520 |                     |        |          | 5047    | 481      |    |

**Supplementary Table S14.** 32 significantly enriched GO-terms

| ID          | Description                                                                                     | GO Class | Gene Ratio | Bg Ratio  | pvalue   | padj     | Count |
|-------------|-------------------------------------------------------------------------------------------------|----------|------------|-----------|----------|----------|-------|
| GO:0033178  | proton-transporting two-sector ATPase complex, catalytic domain                                 | CC       | 44/285     | 51/13283  | 1.28E-67 | 7.55E-66 | 44    |
| GO:0046961  | proton-transporting ATPase activity, rotational mechanism                                       | MF       | 44/285     | 56/13283  | 5.64E-64 | 1.66E-62 | 44    |
| GO:0015991  | ATP hydrolysis coupled proton transport                                                         | BP       | 44/285     | 79/13283  | 2.18E-53 | 4.28E-52 | 44    |
| GO:0007156  | homophilic cell adhesion via plasma membrane adhesion molecules                                 | BP       | 30/285     | 92/13283  | 8.71E-28 | 1.28E-26 | 30    |
| GO:0016620  | oxidoreductase activity, acting on the aldehyde or oxo group of donors, NAD or NADP as acceptor | MF       | 33/285     | 157/13283 | 1.17E-23 | 1.38E-22 | 33    |
| GO:0005126  | cytokine receptor binding                                                                       | MF       | 17/285     | 26/13283  | 7.06E-23 | 6.94E-22 | 17    |
| GO:0006952  | defense response                                                                                | BP       | 17/285     | 30/13283  | 2.51E-21 | 2.11E-20 | 17    |
| GO:0022857  | transmembrane transporter activity                                                              | MF       | 23/285     | 137/13283 | 1.48E-14 | 1.09E-13 | 23    |
| GO:0006006  | glucose metabolic process                                                                       | BP       | 9/285      | 13/13283  | 5.64E-13 | 3.70E-12 | 9     |
| GO:0008641  | ubiquitin-like modifier activating enzyme activity                                              | MF       | 9/285      | 18/13283  | 3.49E-11 | 2.06E-10 | 9     |
| GO:0003746  | translation elongation factor activity                                                          | MF       | 9/285      | 22/13283  | 3.31E-10 | 1.78E-09 | 9     |
| GO:0006414  | translational elongation                                                                        | BP       | 9/285      | 24/13283  | 8.38E-10 | 4.12E-09 | 9     |
| GO:00050661 | NADP binding                                                                                    | MF       | 9/285      | 27/13283  | 2.84E-09 | 1.29E-08 | 9     |
| GO:0000786  | nucleosome                                                                                      | CC       | 15/285     | 100/13283 | 3.21E-09 | 1.35E-08 | 15    |

|            |                                                |    |           |           |             |             |    |
|------------|------------------------------------------------|----|-----------|-----------|-------------|-------------|----|
| GO:0051287 | NAD binding                                    | MF | 9/28<br>5 | 29/13283  | 5.84E-09    | 2.30E-08    | 9  |
| GO:0046982 | protein heterodimerization activity            | MF | 15/285    | 123/13283 | 5.71E-08    | 2.11E-07    | 15 |
| GO:0006879 | cellular iron ion homeostasis                  | BP | 7/285     | 24/13283  | 4.92E-07    | 1.61E-06    | 7  |
| GO:0008199 | ferric iron binding                            | MF | 7/285     | 24/13283  | 4.92E-07    | 1.61E-06    | 7  |
| GO:0006464 | cellular protein modification process          | BP | 7/285     | 30/13283  | 2.59E-06    | 8.05E-06    | 7  |
| GO:0009190 | cyclic nucleotide biosynthetic process         | BP | 7/285     | 32/13283  | 4.13E-06    | 1.16E-05    | 7  |
| GO:0016849 | phosphorus-oxygen lyase activity               | MF | 7/285     | 32/13283  | 4.13E-06    | 1.16E-05    | 7  |
| GO:0036459 | thiol-dependent ubiquitinyl hydrolase activity | MF | 8/285     | 59/13283  | 3.49E-05    | 9.37E-05    | 8  |
| GO:0055085 | transmembrane transport                        | BP | 23/285    | 437/13283 | 6.96E-05    | 0.00017495  | 23 |
| GO:0016579 | protein deubiquitination                       | BP | 8/285     | 65/13283  | 7.12E-05    | 0.00017495  | 8  |
| GO:0005576 | extracellular region                           | CC | 17/285    | 270/13283 | 7.45E-05    | 0.000175727 | 17 |
| GO:0005085 | guanyl-nucleotide exchange factor activity     | MF | 5/285     | 40/13283  | 0.001561931 | 0.003544382 | 5  |
| GO:0008234 | cysteine-type peptidase activity               | MF | 4/285     | 37/13283  | 0.007853378 | 0.017161085 | 4  |
| GO:0007264 | small GTPase mediated signal transduction      | BP | 5/285     | 60/13283  | 0.009165502 | 0.019313022 | 5  |
| GO:0007165 | signal transduction                            | BP | 15/285    | 357/13283 | 0.010292272 | 0.02093945  | 15 |
| GO:0051082 | unfolded protein binding                       | MF | 5/285     | 67/13283  | 0.01436862  | 0.028258286 | 5  |
| GO:0006457 | protein folding                                | BP | 5/285     | 74/13283  | 0.02125821  | 0.040459173 | 5  |
| GO:0016567 | protein ubiquitination                         | BP | 3/285     | 30/13283  | 0.025884015 | 0.047723652 | 3  |

**Supplementary Table S15.** 175 positively selected genes (PSGs) in *Vulpes ferrilata*

| Gene_ID | E value   | Function                                                                                                          |
|---------|-----------|-------------------------------------------------------------------------------------------------------------------|
| MRPL14  | 5.72E-86  | 39S ribosomal protein L14, mitochondrial OS=Bos taurus<br>OX=9913 GN=MRPL14 PE=1 SV=1                             |
| CEP135  | 0         | Centrosomal protein of 135 kDa OS=Homo sapiens<br>OX=9606 GN=CEP135 PE=1 SV=2                                     |
| Slc12a6 | 8.41E-41  | Solute carrier family 12 member 6 OS=Mus musculus<br>OX=10090 GN=Slc12a6 PE=1 SV=2                                |
| SLC16A6 | 0         | Monocarboxylate transporter 7 OS=Homo sapiens<br>OX=9606 GN=SLC16A6 PE=1 SV=2                                     |
| Frmd5   | 0         | FERM domain-containing protein 5 OS=Mus musculus<br>OX=10090 GN=Frmd5 PE=1 SV=1                                   |
| COL28A1 | 0         | Collagen alpha-1(XXVIII) chain OS=Homo sapiens<br>OX=9606 GN=COL28A1 PE=2 SV=2                                    |
| Ccdc189 | 5.57E-139 | Coiled-coil domain-containing protein 189 OS=Mus<br>musculus OX=10090 GN=Ccdc189 PE=1 SV=2                        |
| COP1    | 0         | E3 ubiquitin-protein ligase COP1 OS=Homo sapiens<br>OX=9606 GN=COP1 PE=1 SV=1                                     |
| PGF     | 5.99E-64  | Placenta growth factor OS=Homo sapiens OX=9606<br>GN=PGF PE=1 SV=2                                                |
| PRDM8   | 0         | PR domain zinc finger protein 8 OS=Homo sapiens<br>OX=9606 GN=PRDM8 PE=1 SV=3                                     |
| CNST    | 0         | Consortin OS=Homo sapiens OX=9606 GN=CNST PE=1<br>SV=3                                                            |
| MOG     | 2.02E-103 | Myelin-oligodendrocyte glycoprotein OS=Bos taurus<br>OX=9913 GN=MOG PE=1 SV=1                                     |
| DNALI1  | 7.80E-135 | Axonemal dynein light intermediate polypeptide 1<br>OS=Homo sapiens OX=9606 GN=DNALI1 PE=1 SV=2                   |
| FGF17   | 6.22E-132 | Fibroblast growth factor 17 OS=Homo sapiens OX=9606<br>GN=FGF17 PE=1 SV=1                                         |
| NDUFV2  | 2.74E-168 | NADH dehydrogenase [ubiquinone] flavoprotein 2,<br>mitochondrial OS=Pongo pygmaeus OX=9600<br>GN=NDUFV2 PE=2 SV=1 |
| Abhd18  | 0         | Protein ABHD18 OS=Rattus norvegicus OX=10116<br>GN=Abhd18 PE=2 SV=2                                               |
| GPR156  | 0         | Probable G-protein coupled receptor 156 OS=Homo<br>sapiens OX=9606 GN=GPR156 PE=2 SV=2                            |
| P2RX2   | 0         | P2X purinoceptor 2 OS=Homo sapiens OX=9606<br>GN=P2RX2 PE=1 SV=1                                                  |
| ITPRID1 | 0         | Protein ITPRID1 OS=Homo sapiens OX=9606<br>GN=ITPRID1 PE=2 SV=2                                                   |
| NUP37   | 0         | Nucleoporin Nup37 OS=Homo sapiens OX=9606<br>GN=NUP37 PE=1 SV=1                                                   |
| NR1H3   | 0         | Oxysterols receptor LXR-alpha OS=Bos taurus OX=9913                                                               |

---

|              |           |                                                                                                                           |
|--------------|-----------|---------------------------------------------------------------------------------------------------------------------------|
|              |           | GN=NR1H3 PE=2 SV=1                                                                                                        |
| ARPP21       | 0         | cAMP-regulated phosphoprotein 21 OS=Homo sapiens<br>OX=9606 GN=ARPP21 PE=1 SV=2                                           |
| TDRKH        | 0         | Tudor and KH domain-containing protein OS=Homo<br>sapiens OX=9606 GN=TDRKH PE=1 SV=2                                      |
| SYCP2        | 0         | Synaptonemal complex protein 2 OS=Homo sapiens<br>OX=9606 GN=SYCP2 PE=2 SV=2                                              |
| LBX2         | 9.78E-69  | Transcription factor LBX2 OS=Homo sapiens OX=9606<br>GN=LBX2 PE=2 SV=1                                                    |
| PNOC         | 5.26E-93  | Prepronociceptin OS=Bos taurus OX=9913 GN=PNOC<br>PE=2 SV=1                                                               |
| RHNO1        | 4.31E-91  | RAD9, HUS1, RAD1-interacting nuclear orphan protein 1<br>OS=Homo sapiens OX=9606 GN=RHNO1 PE=1 SV=1                       |
| RBM45        | 0         | RNA-binding protein 45 OS=Homo sapiens OX=9606<br>GN=RBM45 PE=1 SV=1                                                      |
| CCDC190      | 9.09E-87  | Coiled-coil domain-containing protein 190 OS=Bos taurus<br>OX=9913 GN=CCDC190 PE=2 SV=1                                   |
| Pianp        | 7.50E-119 | PILR alpha-associated neural protein OS=Mus musculus<br>OX=10090 GN=Pianp PE=1 SV=1                                       |
| INHBC        | 0         | Inhibin beta C chain OS=Homo sapiens OX=9606<br>GN=INHBC PE=2 SV=1                                                        |
| CDC42SE<br>1 | 2.46E-38  | CDC42 small effector protein 1 OS=Homo sapiens<br>OX=9606 GN=CDC42SE1 PE=1 SV=1                                           |
| MTMR11       | 0         | Myotubularin-related protein 11 OS=Homo sapiens<br>OX=9606 GN=MTMR11 PE=2 SV=2                                            |
| TCTE1        | 0         | Dynein regulatory complex subunit 5 OS=Macaca<br>fascicularis OX=9541 GN=TCTE1 PE=2 SV=1                                  |
| Rbp3         | 0         | Retinol-binding protein 3 OS=Mus musculus OX=10090<br>GN=Rbp3 PE=2 SV=3                                                   |
| PLPP5        | 7.08E-136 | Phospholipid phosphatase 5 OS=Homo sapiens OX=9606<br>GN=PLPP5 PE=1 SV=2                                                  |
| Cdcp2        | 0         | CUB domain-containing protein 2 OS=Mus musculus<br>OX=10090 GN=Cdcp2 PE=2 SV=1                                            |
| STIL         | 0         | SCL-interrupting locus protein OS=Homo sapiens<br>OX=9606 GN=STIL PE=1 SV=2                                               |
| MAMSTR       | 9.35E-176 | MEF2-activating motif and SAP domain-containing<br>transcriptional regulator OS=Bos taurus OX=9913<br>GN=MAMSTR PE=2 SV=2 |
| NLRX1        | 0         | NLR family member X1 OS=Homo sapiens OX=9606<br>GN=NLRX1 PE=1 SV=1                                                        |
| POGZ         | 0         | Pogo transposable element with ZNF domain OS=Homo<br>sapiens OX=9606 GN=POGZ PE=1 SV=2                                    |
| RWDD3        | 2.38E-122 | RWD domain-containing protein 3 OS=Pongo abelii<br>OX=9601 GN=RWDD3 PE=2 SV=1                                             |

---

---

|          |           |                                                                                                              |
|----------|-----------|--------------------------------------------------------------------------------------------------------------|
| PRRC2C   | 0         | Protein PRRC2C OS=Homo sapiens OX=9606<br>GN=PRRC2C PE=1 SV=4                                                |
| AK5      | 0         | Adenylate kinase isoenzyme 5 OS=Homo sapiens<br>OX=9606 GN=AK5 PE=1 SV=2                                     |
| PUS7L    | 0         | Pseudouridylate synthase 7 homolog-like protein<br>OS=Homo sapiens OX=9606 GN=PUS7L PE=1 SV=1                |
| Glp1r    | 0         | Glucagon-like peptide 1 receptor OS=Rattus norvegicus<br>OX=10116 GN=Glp1r PE=2 SV=1                         |
| Mbnl2    | 0         | Muscleblind-like protein 2 OS=Rattus norvegicus<br>OX=10116 GN=Mbnl2 PE=1 SV=1                               |
| DLG5     | 0         | Disks large homolog 5 OS=Homo sapiens OX=9606<br>GN=DLG5 PE=1 SV=4                                           |
| PSD4     | 0         | PH and SEC7 domain-containing protein 4 OS=Homo<br>sapiens OX=9606 GN=PSD4 PE=1 SV=2                         |
| Cmtm5    | 2.79E-88  | CKLF-like MARVEL transmembrane domain-containing<br>protein 5 OS=Mus musculus OX=10090 GN=Cmtm5<br>PE=1 SV=1 |
| GPC5     | 0         | Glypican-5 OS=Homo sapiens OX=9606 GN=GPC5<br>PE=2 SV=1                                                      |
| MAX      | 6.82E-105 | Protein max OS=Homo sapiens OX=9606 GN=MAX<br>PE=1 SV=1                                                      |
| SNTG1    | 0         | Gamma-1-syntrophin OS=Homo sapiens OX=9606<br>GN=SNTG1 PE=1 SV=1                                             |
| Map3k7cl | 2.04E-69  | MAP3K7 C-terminal-like protein OS=Mus musculus<br>OX=10090 GN=Map3k7cl PE=2 SV=1                             |
| CHEK1    | 0         | Serine/threonine-protein kinase Chk1 OS=Homo sapiens<br>OX=9606 GN=CHEK1 PE=1 SV=2                           |
| SYNC     | 0         | Syncoilin OS=Homo sapiens OX=9606 GN=SYNC PE=1<br>SV=3                                                       |
| Gtsf1    | 6.19E-115 | Gametocyte-specific factor 1 OS=Mus musculus<br>OX=10090 GN=Gtsf1 PE=1 SV=1                                  |
| CUSTOS   | 5.47E-91  | Protein CUSTOS OS=Bos taurus OX=9913 GN=CUSTOS<br>PE=2 SV=1                                                  |
| XKR4     | 0         | XK-related protein 4 OS=Homo sapiens OX=9606<br>GN=XKR4 PE=2 SV=1                                            |
| Kcna7    | 0         | Potassium voltage-gated channel subfamily A member 7<br>OS=Mus musculus OX=10090 GN=Kcna7 PE=2 SV=2          |
| NPAS4    | 0         | Neuronal PAS domain-containing protein 4 OS=Homo<br>sapiens OX=9606 GN=NPAS4 PE=1 SV=1                       |
| MTNR1A   | 0         | Melatonin receptor type 1A OS=Homo sapiens OX=9606<br>GN=MTNR1A PE=1 SV=1                                    |
| BMP3     | 0         | Bone morphogenetic protein 3 OS=Homo sapiens<br>OX=9606 GN=BMP3 PE=1 SV=2                                    |
| ASTL     | 0         | Astacin-like metalloendopeptidase OS=Homo sapiens                                                            |

---

---

|          |           |                                                                                                                      |
|----------|-----------|----------------------------------------------------------------------------------------------------------------------|
|          |           | OX=9606 GN=ASTL PE=1 SV=4                                                                                            |
| RGSL1    | 0         | Regulator of G-protein signaling protein-like OS=Homo sapiens OX=9606 GN=RGSL1 PE=2 SV=1                             |
| LGALS4   | 0         | Galectin-4 OS=Homo sapiens OX=9606 GN=LGALS4 PE=1 SV=1                                                               |
| OSM      | 2.06E-67  | Oncostatin-M OS=Homo sapiens OX=9606 GN=OSM PE=1 SV=2                                                                |
| MYCBPAP  | 0         | MYCBP-associated protein OS=Homo sapiens OX=9606 GN=MYCBPAP PE=1 SV=2                                                |
| UQCRB    | 5.43E-32  | Cytochrome b-c1 complex subunit 7 OS=Bos taurus OX=9913 GN=UQCRB PE=1 SV=3                                           |
| CD40LG   | 3.64E-165 | CD40 ligand OS=Canis lupus familiaris OX=9615 GN=CD40LG PE=2 SV=1                                                    |
| TRMT10C  | 0         | tRNA methyltransferase 10 homolog C OS=Bos taurus OX=9913 GN=TRMT10C PE=2 SV=2                                       |
| METTL5   | 6.43E-138 | Methyltransferase-like protein 5 OS=Homo sapiens OX=9606 GN=METTL5 PE=1 SV=1                                         |
| TMEM94   | 0         | Transmembrane protein 94 OS=Homo sapiens OX=9606 GN=TMEM94 PE=1 SV=1                                                 |
| DBX2     | 3.64E-152 | Homeobox protein DBX2 OS=Homo sapiens OX=9606 GN=DBX2 PE=2 SV=2                                                      |
| Ceacam16 | 0         | Carcinoembryonic antigen-related cell adhesion molecule 16 OS=Mus musculus OX=10090 GN=Ceacam16 PE=1 SV=1            |
| NDRG4    | 0         | Protein NDRG4 OS=Homo sapiens OX=9606 GN=NDRG4 PE=1 SV=2                                                             |
| TRIM45   | 0         | Tripartite motif-containing protein 45 OS=Bos taurus OX=9913 GN=TRIM45 PE=2 SV=1                                     |
| MZB1     | 4.03E-95  | Marginal zone B- and B1-cell-specific protein OS=Homo sapiens OX=9606 GN=MZB1 PE=1 SV=1                              |
| CASP14   | 5.17E-131 | Caspase-14 OS=Homo sapiens OX=9606 GN=CASP14 PE=1 SV=2                                                               |
| UFM1     | 2.20E-44  | Ubiquitin-fold modifier 1 OS=Pongo abelii OX=9601 GN=UFM1 PE=3 SV=1                                                  |
| DAW1     | 0         | Dynein assembly factor with WDR repeat domains 1 OS=Bos taurus OX=9913 GN=DAW1 PE=2 SV=1                             |
| Tsppear  | 0         | Thrombospondin-type laminin G domain and EAR repeat-containing protein OS=Mus musculus OX=10090 GN=Tsppear PE=1 SV=1 |
| GUF1     | 0         | Translation factor GUF1, mitochondrial OS=Bos taurus OX=9913 GN=GUF1 PE=2 SV=1                                       |
| EGFL6    | 0         | Epidermal growth factor-like protein 6 OS=Homo sapiens OX=9606 GN=EGFL6 PE=2 SV=1                                    |
| GLT8D2   | 0         | Glycosyltransferase 8 domain-containing protein 2                                                                    |

---

---

|         |          |                                                                                                                          |
|---------|----------|--------------------------------------------------------------------------------------------------------------------------|
|         |          | OS=Bos taurus OX=9913 GN=GLT8D2 PE=2 SV=1                                                                                |
| CFAP52  | 0        | Cilia- and flagella-associated protein 52 OS=Homo sapiens OX=9606 GN=CFAP52 PE=1 SV=3                                    |
| GABPB2  | 0        | GA-binding protein subunit beta-2 OS=Bos taurus OX=9913 GN=GABPB2 PE=2 SV=2                                              |
| CYB5D1  | 6.77E-96 | Cytochrome b5 domain-containing protein 1 OS=Homo sapiens OX=9606 GN=CYB5D1 PE=2 SV=1                                    |
| CIB4    | 1.10E-86 | Calcium and integrin-binding family member 4 OS=Ovis aries OX=9940 GN=CIB4 PE=2 SV=1                                     |
| Pkmyt1  | 0        | Membrane-associated tyrosine- and threonine-specific cdc2-inhibitory kinase OS=Mus musculus OX=10090 GN=Pkmyt1 PE=2 SV=3 |
| KPTN    | 0        | KICSTOR complex protein kaptin OS=Homo sapiens OX=9606 GN=KPTN PE=1 SV=2                                                 |
| SLC5A6  | 0        | Sodium-dependent multivitamin transporter OS=Oryctolagus cuniculus OX=9986 GN=SLC5A6 PE=2 SV=1                           |
| CHP1    | 7.22E-42 | Calcineurin B homologous protein 1 OS=Pongo abelii OX=9601 GN=CHP1 PE=2 SV=3                                             |
| RBM44   | 0        | RNA-binding protein 44 OS=Bos taurus OX=9913 GN=RBM44 PE=3 SV=1                                                          |
| Cluap1  | 0        | Clusterin-associated protein 1 OS=Rattus norvegicus OX=10116 GN=Cluap1 PE=1 SV=1                                         |
| TMEM108 | 0        | Transmembrane protein 108 OS=Bos taurus OX=9913 GN=TMEM108 PE=2 SV=1                                                     |
| unanme  | 4.29E-79 | Uncharacterized protein C2orf50 homolog OS=Bos taurus OX=9913 PE=2 SV=2                                                  |
| ZNF207  | 0        | BUB3-interacting and GLEBS motif-containing protein ZNF207 OS=Pongo abelii OX=9601 GN=ZNF207 PE=2 SV=1                   |
| ODAPH   | 1.25E-39 | Odontogenesis associated phosphoprotein OS=Homo sapiens OX=9606 GN=ODAPH PE=1 SV=1                                       |
| TOR3A   | 0        | Torsin-3A OS=Homo sapiens OX=9606 GN=TOR3A PE=1 SV=1                                                                     |
| PNKD    | 0        | Probable hydrolase PNKD OS=Bos taurus OX=9913 GN=PNKD PE=2 SV=1                                                          |
| Rsph14  | 2.59E-54 | Radial spoke head 14 homolog OS=Mus musculus OX=10090 GN=Rsph14 PE=2 SV=1                                                |
| FAM227A | 0        | Protein FAM227A OS=Homo sapiens OX=9606 GN=FAM227A PE=1 SV=1                                                             |
| CTNS    | 0        | Cystinosin OS=Bos taurus OX=9913 GN=CTNS PE=2 SV=1                                                                       |
| BUD23   | 4.62E-63 | Probable 18S rRNA (guanine-N(7))-methyltransferase OS=Bos taurus OX=9913 GN=BUD23 PE=2 SV=1                              |

---



---

|              |           |                                                                                                |
|--------------|-----------|------------------------------------------------------------------------------------------------|
| Tcf7         | 0         | Transcription factor 7 OS=Mus musculus OX=10090<br>GN=Tcf7 PE=2 SV=2                           |
| FAM189A<br>1 | 0         | Protein FAM189A1 OS=Homo sapiens OX=9606<br>GN=FAM189A1 PE=2 SV=4                              |
| ATXN7L1      | 0         | Ataxin-7-like protein 1 OS=Homo sapiens OX=9606<br>GN=ATXN7L1 PE=1 SV=3                        |
| HTATIP2      | 3.10E-153 | Oxidoreductase HTATIP2 OS=Homo sapiens OX=9606<br>GN=HTATIP2 PE=1 SV=2                         |
| IQCD         | 0         | Dynein regulatory complex protein 10 OS=Bos taurus<br>OX=9913 GN=IQCD PE=2 SV=1                |
| SPATA6       | 0         | Spermatogenesis-associated protein 6 OS=Bos taurus<br>OX=9913 GN=SPATA6 PE=2 SV=2              |
| CHRNA9       | 0         | Neuronal acetylcholine receptor subunit alpha-9<br>OS=Homo sapiens OX=9606 GN=CHRNA9 PE=1 SV=2 |
| CABP5        | 4.67E-102 | Calcium-binding protein 5 OS=Homo sapiens OX=9606<br>GN=CABP5 PE=1 SV=1                        |
| SERTAD4      | 3.37E-128 | SERTA domain-containing protein 4 OS=Homo sapiens<br>OX=9606 GN=SERTAD4 PE=2 SV=1              |
| TBC1D16      | 0         | TBC1 domain family member 16 OS=Homo sapiens<br>OX=9606 GN=TBC1D16 PE=2 SV=1                   |
| Klk11        | 5.18E-157 | Kallikrein-11 OS=Mus musculus OX=10090 GN=Klk11<br>PE=2 SV=1                                   |
| Kncn         | 3.67E-53  | Kinocilin OS=Mus musculus OX=10090 GN=Kncn PE=1<br>SV=1                                        |
| FAM131C      | 1.33E-131 | Protein FAM131C OS=Homo sapiens OX=9606<br>GN=FAM131C PE=1 SV=2                                |
| TTLL1        | 0         | Probable tubulin polyglutamylase TTLL1 OS=Homo<br>sapiens OX=9606 GN=TTLL1 PE=2 SV=1           |
| TGS1         | 0         | Trimethylguanosine synthase OS=Homo sapiens<br>OX=9606 GN=TGS1 PE=1 SV=3                       |
| MRPS15       | 1.28E-92  | 28S ribosomal protein S15, mitochondrial OS=Bos taurus<br>OX=9913 GN=MRPS15 PE=1 SV=3          |
| CCDC62       | 0         | Coiled-coil domain-containing protein 62 OS=Homo<br>sapiens OX=9606 GN=CCDC62 PE=1 SV=2        |
| IQCF2        | 4.17E-59  | IQ domain-containing protein F2 OS=Bos taurus<br>OX=9913 GN=IQCF2 PE=2 SV=1                    |
| SLX4IP       | 2.34E-111 | Protein SLX4IP OS=Homo sapiens OX=9606<br>GN=SLX4IP PE=1 SV=1                                  |
| NOB1         | 0         | RNA-binding protein NOB1 OS=Bos taurus OX=9913<br>GN=NOB1 PE=2 SV=1                            |
| AK6          | 1.73E-83  | Adenylate kinase isoenzyme 6 OS=Bos taurus OX=9913<br>GN=AK6 PE=2 SV=1                         |
| PRDM10       | 0         | PR domain zinc finger protein 10 OS=Homo sapiens<br>OX=9606 GN=PRDM10 PE=1 SV=3                |

---

---

|               |           |                                                                                                            |
|---------------|-----------|------------------------------------------------------------------------------------------------------------|
| UNC80         | 0         | Protein unc-80 homolog OS=Homo sapiens OX=9606<br>GN=UNC80 PE=1 SV=2                                       |
| BEND4         | 0         | BEN domain-containing protein 4 OS=Homo sapiens<br>OX=9606 GN=BEND4 PE=2 SV=3                              |
| SLC24A1       | 0         | Sodium/potassium/calcium exchanger 1 OS=Homo<br>sapiens OX=9606 GN=SLC24A1 PE=1 SV=1                       |
| Pax9          | 0         | Paired box protein Pax-9 OS=Mus musculus OX=10090<br>GN=Pax9 PE=2 SV=1                                     |
| GHRHR         | 0         | Growth hormone-releasing hormone receptor OS=Homo<br>sapiens OX=9606 GN=GHRHR PE=1 SV=2                    |
| PPP4R4        | 0         | Serine/threonine-protein phosphatase 4 regulatory subunit<br>4 OS=Homo sapiens OX=9606 GN=PPP4R4 PE=1 SV=1 |
| ZMAT4         | 2.56E-126 | Zinc finger matrin-type protein 4 OS=Bos taurus<br>OX=9913 GN=ZMAT4 PE=2 SV=1                              |
| LYPLAL1       | 9.07E-136 | Lysophospholipase-like protein 1 OS=Homo sapiens<br>OX=9606 GN=LYPLAL1 PE=1 SV=3                           |
| DCAF17        | 0         | DDB1- and CUL4-associated factor 17 OS=Homo sapiens<br>OX=9606 GN=DCAF17 PE=1 SV=1                         |
| SIRT4         | 1.17E-169 | NAD-dependent protein lipoamidase sirtuin-4,<br>mitochondrial OS=Bos taurus OX=9913 GN=SIRT4 PE=2<br>SV=1  |
| MMAA          | 0         | Methylmalonic aciduria type A protein, mitochondrial<br>OS=Homo sapiens OX=9606 GN=MMAA PE=1 SV=1          |
| PIKFYVE       | 0         | 1-phosphatidylinositol 3-phosphate 5-kinase OS=Homo<br>sapiens OX=9606 GN=PIKFYVE PE=1 SV=3                |
| KIAA1549<br>L | 0         | UPF0606 protein KIAA1549L OS=Homo sapiens<br>OX=9606 GN=KIAA1549L PE=2 SV=2                                |
| Spock1        | 5.82E-170 | Testican-1 OS=Mus musculus OX=10090 GN=Spock1<br>PE=2 SV=2                                                 |
| GTPBP1        | 0         | GTP-binding protein 1 OS=Homo sapiens OX=9606<br>GN=GTPBP1 PE=1 SV=3                                       |
| TMEM8B        | 0         | Transmembrane protein 8B OS=Bos taurus OX=9913<br>GN=TMEM8B PE=2 SV=1                                      |
| CA6           | 0         | Carbonic anhydrase 6 OS=Canis lupus familiaris<br>OX=9615 GN=CA6 PE=2 SV=1                                 |
| SNX31         | 0         | Sorting nexin-31 OS=Homo sapiens OX=9606<br>GN=SNX31 PE=1 SV=3                                             |
| MGME1         | 0         | Mitochondrial genome maintenance exonuclease 1<br>OS=Homo sapiens OX=9606 GN=MGME1 PE=1 SV=1               |
| GPANK1        | 0         | G patch domain and ankyrin repeat-containing protein 1<br>OS=Homo sapiens OX=9606 GN=GPANK1 PE=1 SV=1      |
| IQCK          | 2.50E-141 | IQ domain-containing protein K OS=Homo sapiens<br>OX=9606 GN=IQCK PE=2 SV=1                                |
| FRMPD1        | 0         | FERM and PDZ domain-containing protein 1 OS=Homo                                                           |

---

---

|          |           |                                                                                                                 |
|----------|-----------|-----------------------------------------------------------------------------------------------------------------|
|          |           | sapiens OX=9606 GN=FRMPD1 PE=1 SV=1                                                                             |
| RPIA     | 0         | Ribose-5-phosphate isomerase OS=Homo sapiens<br>OX=9606 GN=RPIA PE=1 SV=3                                       |
| CCDC38   | 0         | Coiled-coil domain-containing protein 38 OS=Homo sapiens<br>OX=9606 GN=CCDC38 PE=2 SV=1                         |
| NUTM1    | 0         | NUT family member 1 OS=Homo sapiens OX=9606<br>GN=NUTM1 PE=1 SV=2                                               |
| ERLIN2   | 0         | Erlin-2 OS=Pongo abelii OX=9601 GN=ERLIN2 PE=2<br>SV=1                                                          |
| CD72     | 9.59E-135 | B-cell differentiation antigen CD72 OS=Homo sapiens<br>OX=9606 GN=CD72 PE=2 SV=1                                |
| BIRC6    | 0         | Baculoviral IAP repeat-containing protein 6 OS=Homo sapiens<br>OX=9606 GN=BIRC6 PE=1 SV=2                       |
| NR1H4    | 0         | Bile acid receptor OS=Bos taurus OX=9913 GN=NR1H4<br>PE=2 SV=1                                                  |
| RELB     | 0         | Transcription factor RelB OS=Homo sapiens OX=9606<br>GN=RELB PE=1 SV=2                                          |
| TREML2   | 6.05E-126 | Trem-like transcript 2 protein OS=Homo sapiens<br>OX=9606 GN=TREML2 PE=1 SV=2                                   |
| DYDC1    | 8.06E-75  | DPY30 domain-containing protein 1 OS=Homo sapiens<br>OX=9606 GN=DYDC1 PE=1 SV=1                                 |
| Ninj2    | 2.46E-62  | Ninjurin-2 OS=Rattus norvegicus OX=10116 GN=Ninj2<br>PE=2 SV=1                                                  |
| CLHC1    | 0         | Clathrin heavy chain linker domain-containing protein 1<br>OS=Macaca fascicularis OX=9541 GN=CLHC1 PE=2<br>SV=1 |
| RAB9B    | 1.33E-119 | Ras-related protein Rab-9B OS=Pongo abelii OX=9601<br>GN=RAB9B PE=2 SV=1                                        |
| SERPINE3 | 1.33E-104 | Serpin E3 OS=Homo sapiens OX=9606 GN=SERPINE3<br>PE=2 SV=2                                                      |
| FANCG    | 0         | Fanconi anemia group G protein OS=Homo sapiens<br>OX=9606 GN=FANCG PE=1 SV=1                                    |
| SLC51B   | 4.93E-37  | Organic solute transporter subunit beta OS=Homo sapiens<br>OX=9606 GN=SLC51B PE=2 SV=2                          |
| VEGFA    | 1.29E-74  | Vascular endothelial growth factor A OS=Canis lupus<br>familiaris OX=9615 GN=VEGFA PE=1 SV=1                    |
| NKIRAS1  | 2.31E-66  | NF-kappa-B inhibitor-interacting Ras-like protein 1<br>OS=Macaca fascicularis OX=9541 GN=NKIRAS1 PE=2<br>SV=1   |
| PAX5     | 0         | Paired box protein Pax-5 OS=Homo sapiens OX=9606<br>GN=PAX5 PE=1 SV=1                                           |
| Gm11992  | 3.28E-144 | Uncharacterized protein C7orf57 homolog OS=Mus<br>musculus OX=10090 GN=Gm11992 PE=1 SV=1                        |
| HOXB1    | 3.15E-160 | Homeobox protein Hox-B1 OS=Pan troglodytes OX=9598                                                              |

---

---

|         |           |                                                                                           |
|---------|-----------|-------------------------------------------------------------------------------------------|
|         |           | GN=HOXB1 PE=3 SV=1                                                                        |
| CIART   | 3.50E-149 | Circadian-associated transcriptional repressor OS=Homo sapiens OX=9606 GN=CIART PE=1 SV=1 |
| WDR33   | 0         | pre-mRNA 3' end processing protein WDR33 OS=Homo sapiens OX=9606 GN=WDR33 PE=1 SV=2       |
| RAB36   | 5.02E-169 | Ras-related protein Rab-36 OS=Homo sapiens OX=9606 GN=RAB36 PE=2 SV=2                     |
| Tmprss3 | 0         | Transmembrane protease serine 3 OS=Mus musculus OX=10090 GN=TmpRSS3 PE=1 SV=2             |
| E2F5    | 0         | Transcription factor E2F5 OS=Homo sapiens OX=9606 GN=E2F5 PE=1 SV=1                       |

---

**Supplementary Table S16.** 9 Positive selection genes may be related to adaptation of *V. ferrilata* to low oxygen and high UV radiation

| Function                        | Count | Genes                                                                                                                                                                                                                                                                            |
|---------------------------------|-------|----------------------------------------------------------------------------------------------------------------------------------------------------------------------------------------------------------------------------------------------------------------------------------|
| Angiogenesis related genes      | 6     | Vascular endothelial growth factor A ( <i>VEGFA</i> ), RWD domain containing 3 ( <i>RWDD3</i> ), MYC associated factor X ( <i>MAX</i> ), HIV-1 tat interactive protein 2 ( <i>HTATIP2</i> ), EGF like domain multiple 6 ( <i>EGFL6</i> ), Placental growth factor ( <i>PGF</i> ) |
| DNA damage repair related genes | 3     | Mitochondrial genome maintenance exonuclease 1 ( <i>MGME1</i> ), FA complementation group G ( <i>FANCG</i> ), Sirtuin 4 ( <i>SIRT4</i> )                                                                                                                                         |

**Supplementary Table S17.** Accession number.

---

| <b>Category</b>                | <b>App</b>                       | <b>Accession number</b> |
|--------------------------------|----------------------------------|-------------------------|
| Genome and RNA sequencing data | NCBI Sequence Read Archive (SRA) | PRJNA762184             |
| Hi-C sequencing data           | NCBI Sequence Read Archive (SRA) | PRJNA768296             |
| Genome assembly                | NCBI WGS                         | JAJBZS000000000         |

---

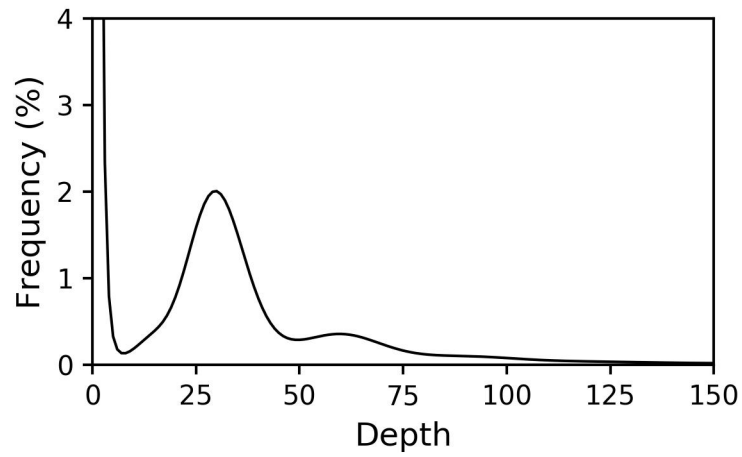

**Supplementary Figure S1.** Genome survey of *Vulpes ferrilata* using 17-mer analysis. K-mer depth on the horizontal axis and K-mer depth frequency on the vertical axis.

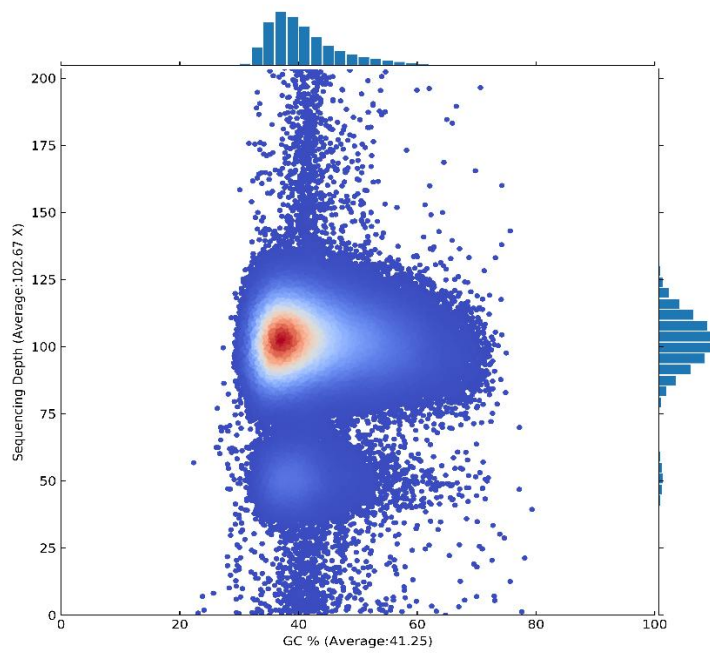

**Supplementary Figure S2.** The GC Depth distribution of the genome, where the abscissa is the GC content, and the ordinate is the Depth. These two values are counted sequentially in a 10Kb window.



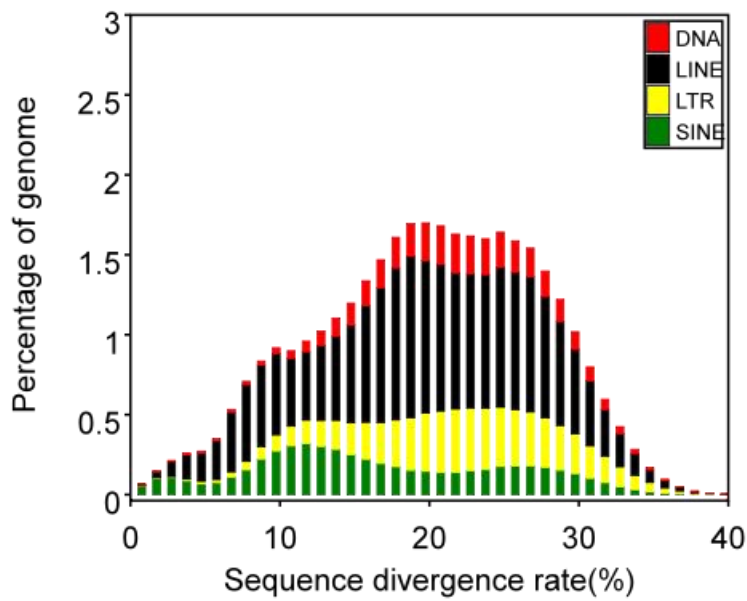

**Supplementary Figure S3.** RepeatableModeler transposon differentiation rate. The abscissor is the divergence degree between annotated TE sequences in the genome and corresponding sequences in the total library file, and the ordinate is the percentage of TE sequences under the divergence degree in the genome. Different TEs are labeled in different colors: DNA-red, LINE-black, LTR- yellow, and SINE-green.



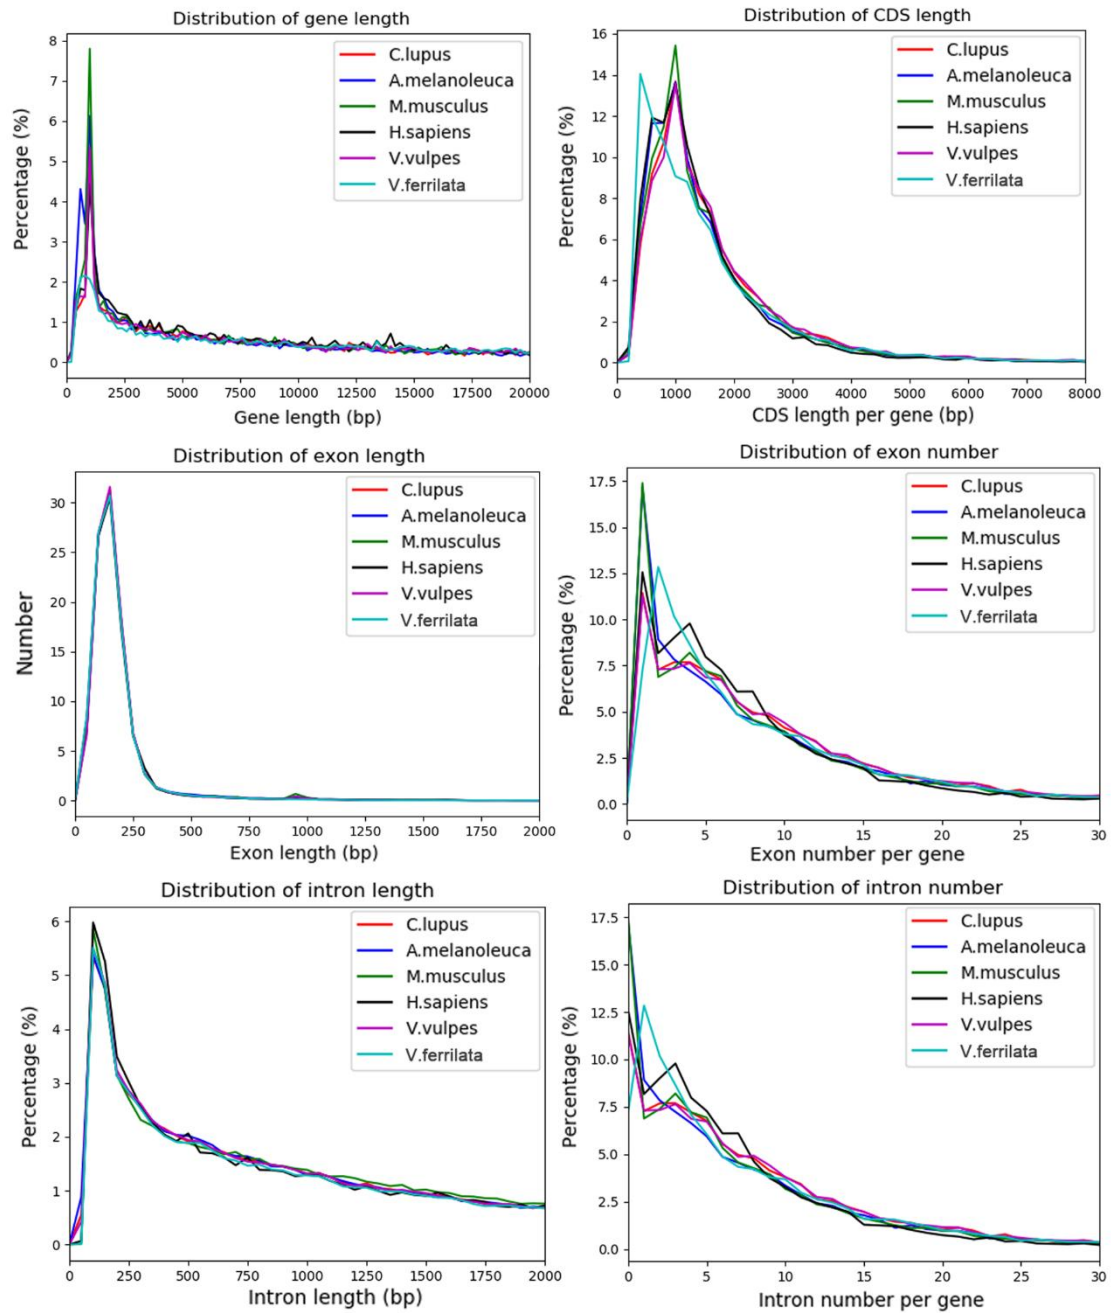

**Supplementary Figure S5.** Comparisons of the distribution of gene, coding sequences (CDS), exon and intron length for protein-coding genes in the genomes of *Vulpes ferrilata* and other species.

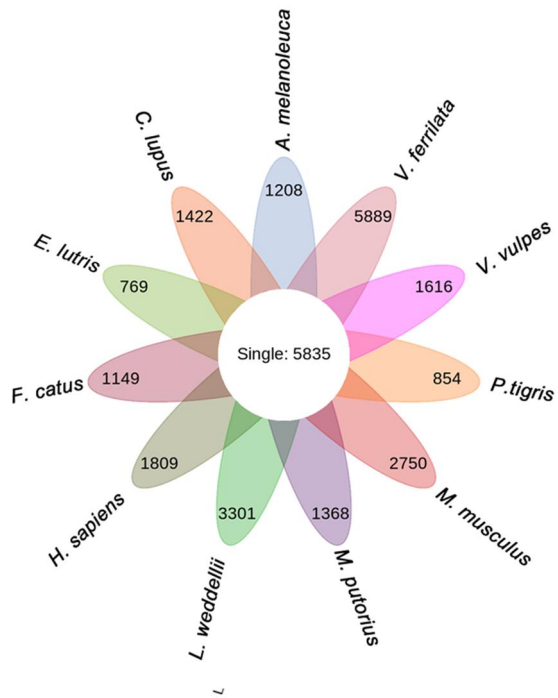

**Supplementary Figure S6.** Venn plot of single copy genes and specific genes of each species.

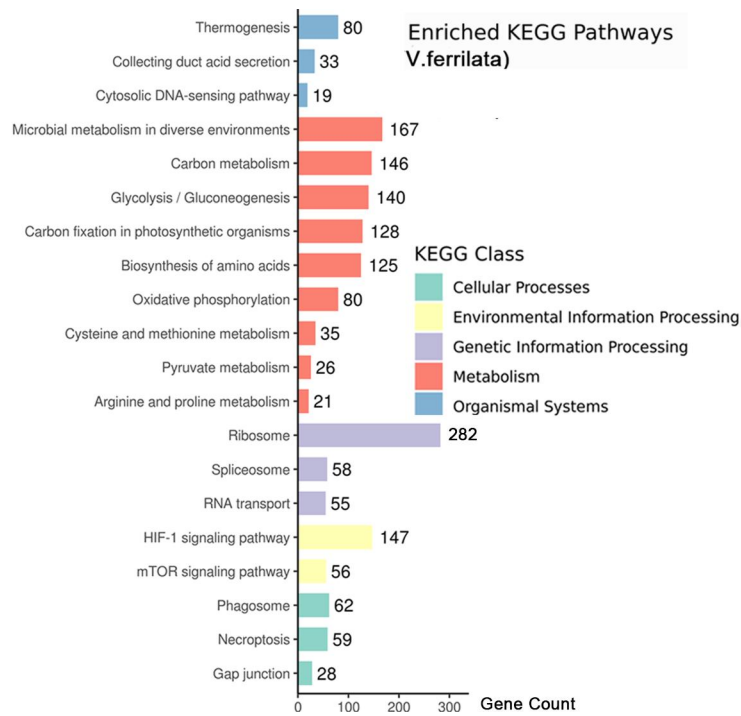

**Supplementary Figure S7.** KEGG enrichment analysis of species-specific genes of *Vulpes ferrilata*.

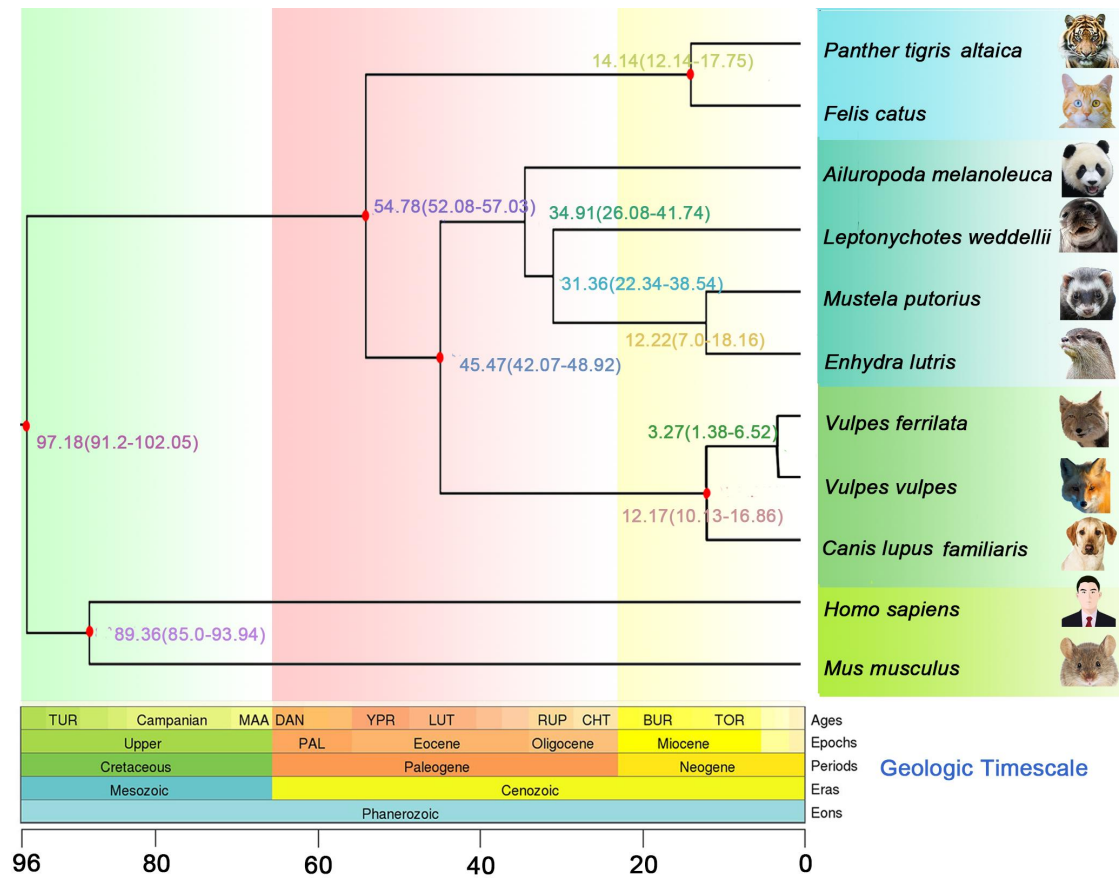

**Supplementary Figure S8.** Phylogenetic tree of *Vulpes ferrilata* with 10 genomes including 8 other Canidae. The value on each node represents the differentiation time of the present (Million years ago, Mya), the nodes marked in red are known fossil time points.
